# Supplementary material for: Up-regulation of BMP2/4 signaling increases both osteoblast-specific marker expression and bone marrow adipogenesis in Gja1Jrt/+ stromal cell cultures
Source: PubMed Central journal article supplement — Mol Biol Cell. 2015 Mar 1;26(5):832–42. doi: 10.1091/mbc.E14-06-1136 (PMC4342021; doi:10.1091/mbc.e14-06-1136), 2015-03-01
Supplement: supp_E14-06-1136v1_CombinedSupMats.pdf [file supp_E14-06-1136v1_CombinedSupMats.pdf]

# Supplemental Materials

*Molecular Biology of the Cell*

Zappitelli et al.

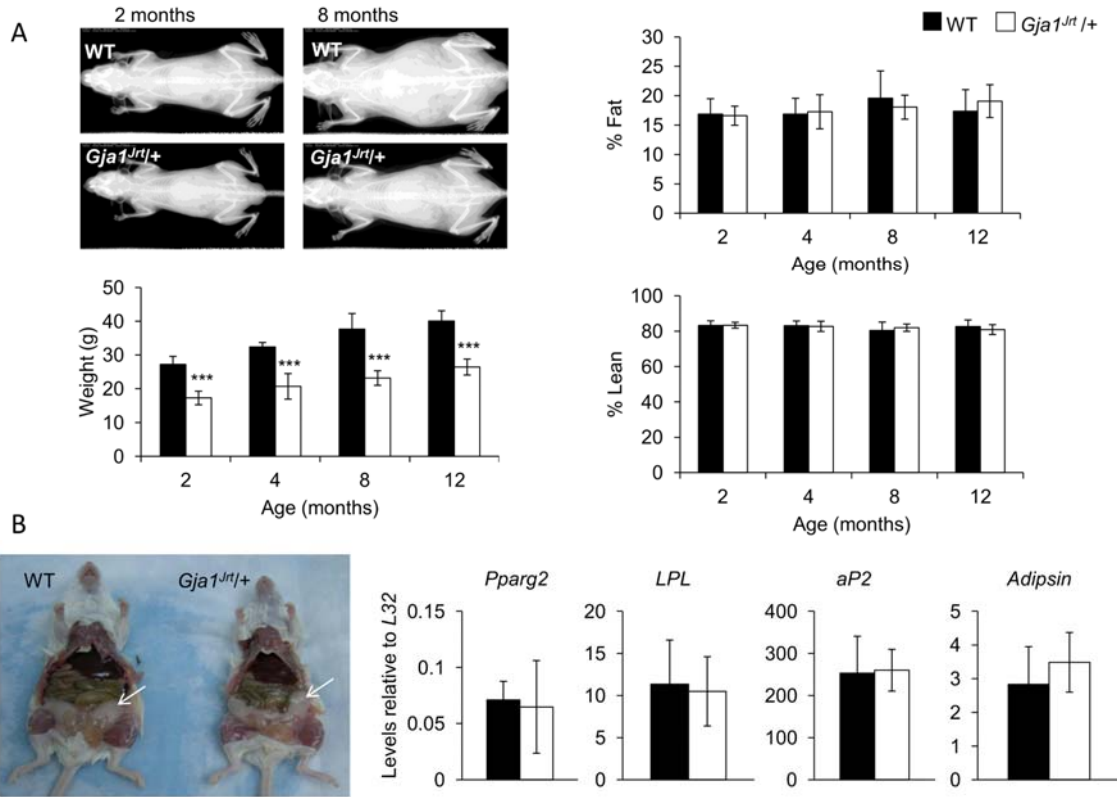

Supplemental Figure 1. The *Gja1<sup>Jrt</sup>* mutation does not cause a systemic increase in adipogenesis or adipocyte activity. (A) Representative DEXA images of WT and *Gja1<sup>Jrt/+</sup>* mice at 2 and 8 months of age. Measurements showed that *Gja1<sup>Jrt/+</sup>* mice had significantly lower body weight than WT littermates at all ages. No differences in percentage fat or percentage lean mass were noted at any age; n = 9. (B) Representative images of WT and *Gja1<sup>Jrt/+</sup>* epididymal fat pads. Expression of adipocyte-associated markers were unchanged in RNA isolated from epididymal fat pads of WT versus *Gja1<sup>Jrt/+</sup>* mice; n ≥ 3. \*p<0.05, \*\*p<0.01 and \*\*\*p<0.001.

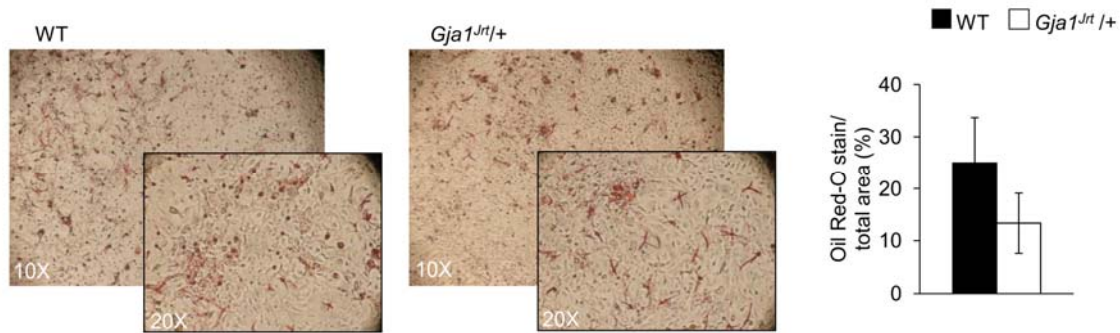

Supplemental Figure 2. Effect of the *Gja1<sup>Jrt</sup>* mutation on formation of bone marrow-derived adipocytes *in vitro*. (A) Representative images of end-point adipogenic stromal cultures stained with Oil Red-O. The stromal cells were cultured under adipogenic conditions for approximately 6 days or until adipocytes could be identified by the presence of visible lipid droplets. (B) The amount of Oil Red-O staining was unaffected between genotypes; n = 3. \*p<0.05, \*\*p<0.01 and \*\*\*p<0.001.

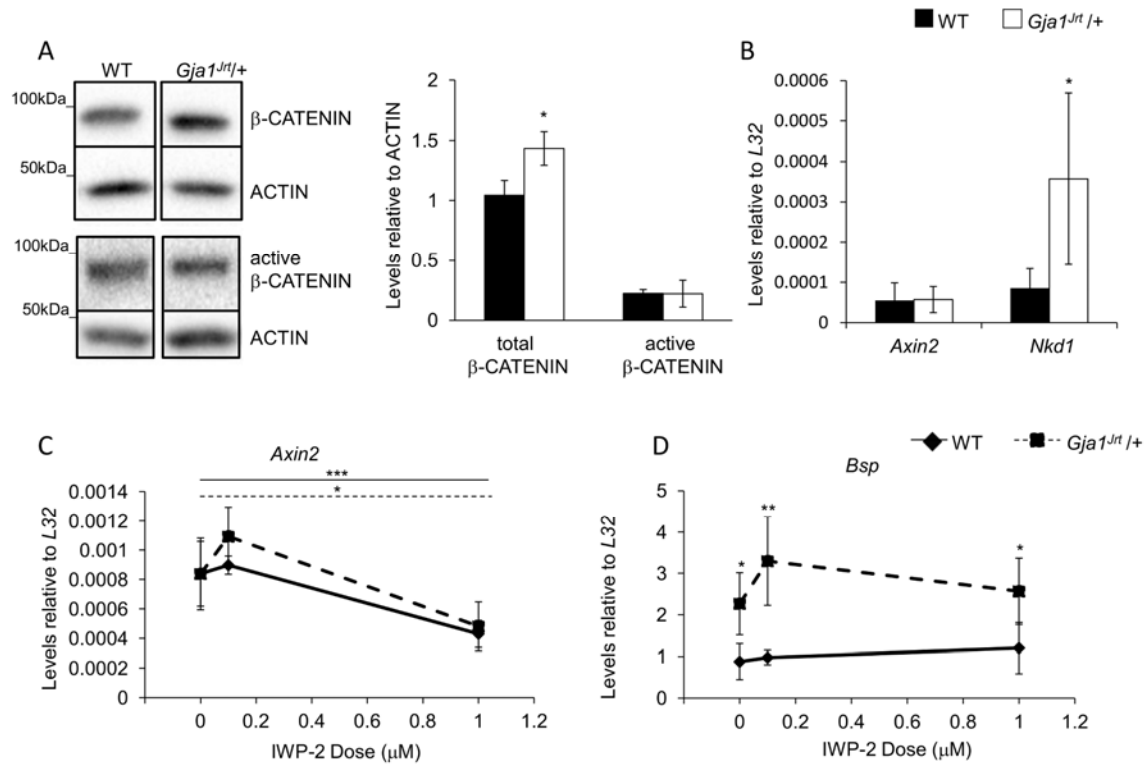

Supplemental Figure 3. Changes in Wnt/ $\beta$ -catenin signaling cannot account for the upregulation of *Bsp* expression in hyperactive *Gja1<sup>Jrt/+</sup>* osteoblasts. (A) The level of total  $\beta$ -CATENIN protein was significantly increased in *Gja1<sup>Jrt/+</sup>* versus WT confluent osteogenic stromal cultures derived from 4 month old mice. Levels of active  $\beta$ -CATENIN (antibody recognizes the active form of  $\beta$ -CATENIN, dephosphorylated on Ser37 and Thr41) were unchanged. Shown is one representative blot;  $n \geq 4$ . (B) Expression of direct  $\beta$ -catenin target genes, *Axin2* and *Nkd1*, were unaffected and increased, respectively, in *Gja1<sup>Jrt/+</sup>* versus WT cells;  $n \geq 8$ . When confluent osteogenic stromal cells were treated with IWP-2, a Wnt signaling inhibitor, (C) the expression of *Axin2* decreased significantly, but (D) the expression of *Bsp* remained significantly increased in *Gja1<sup>Jrt/+</sup>* versus WT cells. Expression of *Bsp* was unchanged by IWP-2 treatment in cells of both genotypes;  $n \geq 3$ . Solid and dashed lines indicate significant differences over dosage concentration in WT and *Gja1<sup>Jrt/+</sup>* mice, respectively. \* $p < 0.05$ , \*\* $p < 0.01$  and \*\*\* $p < 0.001$ .

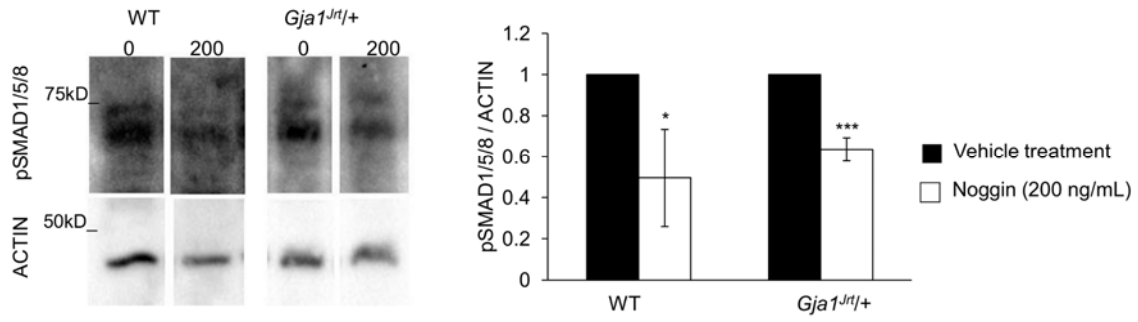

Supplemental Figure 4. Levels of pSMAD1/5/8 were significantly reduced in both WT and *Gja1<sup>Jrt/+</sup>* stromal cells treated with 200ng/mL of Noggin versus vehicle treated cells. One representative blot is shown; n = 3. \*p<0.05, \*\*p<0.01 and \*\*\*p<0.001.

Supplemental Table 1. Quantitative RT-PCR primer sequences used in this study.

| <b>Gene</b>             | <b>Direction</b>   | <b>Sequence</b>                                    |
|-------------------------|--------------------|----------------------------------------------------|
| <i>Adipsin</i>          | Forward<br>Reverse | TTGCAGGGGAGACTCCGGCAG<br>CTCGGGTATAGACGCCCGGCT     |
| <i>aP2</i>              | Forward<br>Reverse | TAACCCTAGATGGCGGGGCC<br>AACACATTCCACCACCAGCTTGT    |
| <i>Axin2</i>            | Forward<br>Reverse | GCATCGCAGTGTGAAGGCCAA<br>AGCAGGTTCCACAGGCGTCA      |
| <i>Bsp*</i>             | Forward<br>Reverse | CAGGGAGGCAGTGA CTCTTC<br>AGTGTGGAAAGTGTGGCGTT      |
| <i>Bmp2</i>             | Forward<br>Reverse | GAGGCGAAGAAAAGCAACAG<br>GGGGAAGCAGCAACACTAGA       |
| <i>Bmp4</i>             | Forward<br>Reverse | TTCCTGGTAACCGAATGCTGA<br>CCTGAATCTCGGCGACTTTTT     |
| <i>L32</i> <sup>#</sup> | Forward<br>Reverse | CACAATGTCAAGGAGCTGGAAGT<br>TCTACAATGGCTTTTCGGTTCT  |
| <i>LPL</i>              | Forward<br>Reverse | GACTTGCCCTACGGCGCTCC<br>AATCTCTTCCC GCGTCTGCTGC    |
| <i>Nkd1</i>             | Forward<br>Reverse | GGAGGACAGCCGGCAAGAGTG<br>ACCCGCAGTGTCTTGCTTGATG    |
| <i>Pparg2</i>           | Forward<br>Reverse | TCGCTGATGCACTGCCTATG<br>GAGAGGTCCACAGAGCTGATT      |
| <i>Tcf7</i>             | Forward<br>Reverse | AGCCAGAAGCAAGGAGTTCACAGG<br>GCAGGAAGGGGACAGGGGGTAG |

Supplemental Table 2. List of antibodies used in this study.

| <b>Antigen</b>            | <b>Host</b> | <b>Company</b>            | <b>Catalogue ID</b> |
|---------------------------|-------------|---------------------------|---------------------|
| ACTIN                     | Rabbit      | Sigma-Aldrich             | A2066               |
| $\beta$ -CATENIN (active) | Mouse       | Millipore                 | 05-665              |
| $\beta$ -CATENIN (total)  | Rabbit      | Abcam                     | ab6302              |
| CREB                      | Rabbit      | Cell Signaling Technology | 4820                |
| Connexin 43               | Rabbit      | Invitrogen                | 71-0700             |
| pCREB                     | Rabbit      | Cell Signaling Technology | 4276                |
| SMAD 1                    | Rabbit      | Invitrogen                | 38-5400             |
| pSMAD 1/5/8               | Rabbit      | Cell Signaling Technology | 9511                |
| Anti-mouse IgG-HRP        | Goat        | Thermo Scientific         | LE146795            |
| Anti-rabbit IgG-HRP       | Goat        | Santa Cruz Biotech., Inc. | sc-2004             |
